# Supplementary material for: F-18 FDG PET/CT in Relapsing Polychondritis Patients with Initial Respirotory Symptoms: Imaging Features and Association with Pulmonary Function and Disease Activity
Source: Research Square preprint supplement (doi:10.21203/rs.3.rs-1240149/v1), 2022-01-11
Supplement: Supplementary file 1 [file 1f1b3f1571cd57b5bbd692fa.pdf]

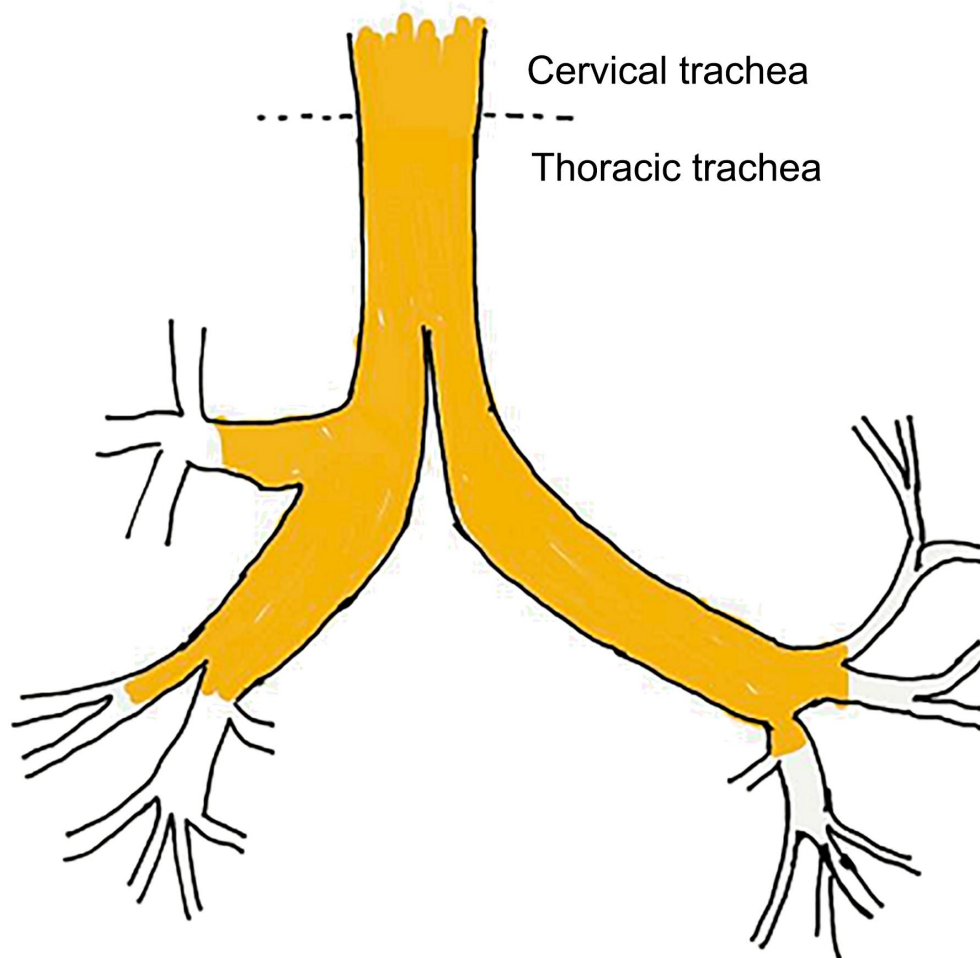

Supplementary Fig. 1. Illustration of the segmentation of tracheo-bronchia, which was divided into 9 segments, including 2 segments of the trachea (cervical and thoracic) and 7 main branch segments (bilateral main-stem bronchi; 3 right lobar bronchi and 2 left lobar bronchi)
