# Supplementary material for: F-18 FDG PET/CT in Relapsing Polychondritis Patients with Initial Respirotory Symptoms: Imaging Features and Association with Pulmonary Function and Disease Activity
Source: Research Square preprint supplement (doi:10.21203/rs.3.rs-1240149/v1), 2022-01-11
Supplement: Supplementary file 2 [file 4bec1222165b8fd0f18ff0d7.pdf]

Supplementary Table 1. Definition of positive PET imaging on PET/CT

|                        | PET |                                           | CT                    |
|------------------------|-----|-------------------------------------------|-----------------------|
|                        | VS  | Location/shape                            |                       |
| Trachea-bronchial tree | ≥1  | consistent with the shape of airway on CT | +/-                   |
| Larynx                 | ≥1  | Laryngeal cartilages                      | +/-                   |
| Costal cartilages      | ≥1  | consistent with the shape of ribs on CT   | +/-                   |
| auricular cartilage    | ≥2  | /                                         | +/-                   |
| nasal cartilages       | ≥1  | /                                         | Swelling, destruction |
| peripheral joints      | ≥1  | /                                         | +/-                   |
